# Supplementary material
Source: PubMed Central journal article supplement (PMC1976210)
Supplement: pnas_0704665104_5.pdf [file pnas_0704665104_5.pdf]

Refseq  
Vindija-80 AAAACCTTTTCCAAGGACAAATCAGAGAAAAAGTCTTTAACTCCACCATTAGCACCCAAAGCTAAGATTCTAATTTAAACTATTCTCTGTCTTTTCATGGGGAGCAGATTTGGGTACCACCCAAGTATTGACTCACCCATCAACAACCGCTATGTATTTTCGTACATTACTGCCAGCCA  
 454-1 .....G.....G.....  
 454-2 .....G.....  
 454-3 .....T.....G.....A

Refseq  
Vindija-80 CCATGAATATTGTACGGTACCATAAACTTTGACCACCTGTAGTACATAAAAAACCAATCCACATCAAAACCCCTCCCATGCTTACAAGCAAGTACAGCAATCAACCCTCAACTATCACACATCAACTGCAACTCCAAGCCACCCCTCACCCACTAGGATACCAACAACTACCC  
 .....A.....T.....T.....C.....T.....CC.....C.....C.....T.....G.....T.....A.....A.G.....T.A.....T.....  
 454-4 .....C.....T.....G.....T.....A.....A.G.....T.A.....  
 454-5 .....T.....A.....A.G.....T.A.....T.....  
 454-6 .....A.G.....T.A.....T.....

Refseq  
Vindija-80 (FeldhoferI) ACCCTTAAACAGTACATAGTACATAAAGCCATTTACCGTACATAGCACATTACAGTCAAAATCCCTTCTCGTCCCATGGATGACCCCTTCAGATAGGGGTCCCTTGACCCACCATCCCTCCGCGTAAATCAATATCCCGCACAAGAGTGCTACTCTCCTCGCTCCGGGCCATAACACTTGGG  
 .....G.....C.....T.....C.....  
 (.....T)  
 454-6 .....G.....C.....T.....A  
 454-7 .....T.....T.....

Frequency in contemporary humans (N>2,900):

- G 0.1%
- A 0%
- T 0%
- T 0.1%
