# Supplementary material
Source: PubMed Central journal article supplement (PMC1976210)

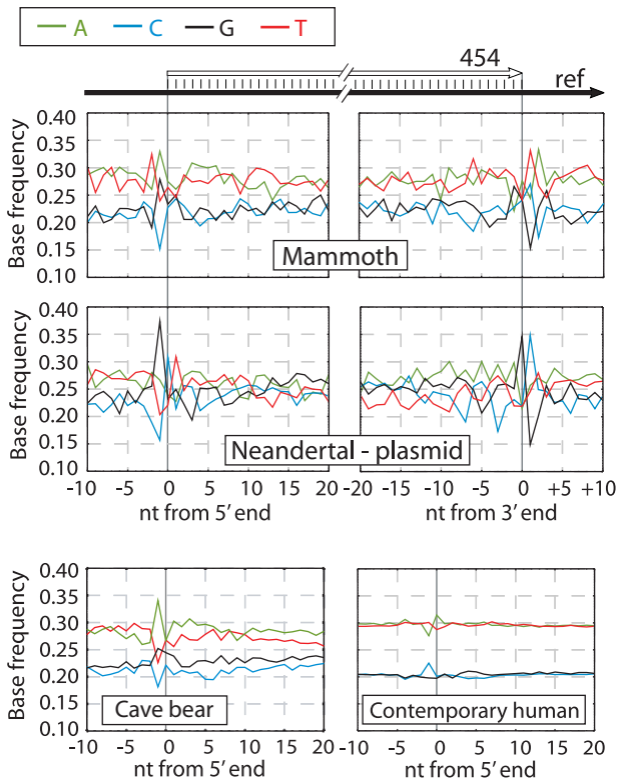

Supplement: pnas_0704665104_1.pdf [file pnas_0704665104_1.pdf]

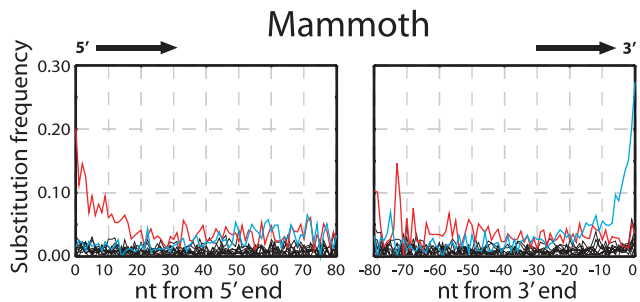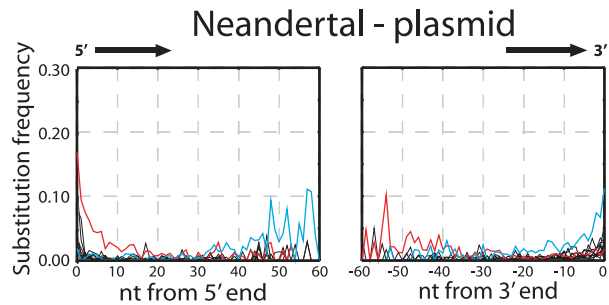

— C to T — G to A — other

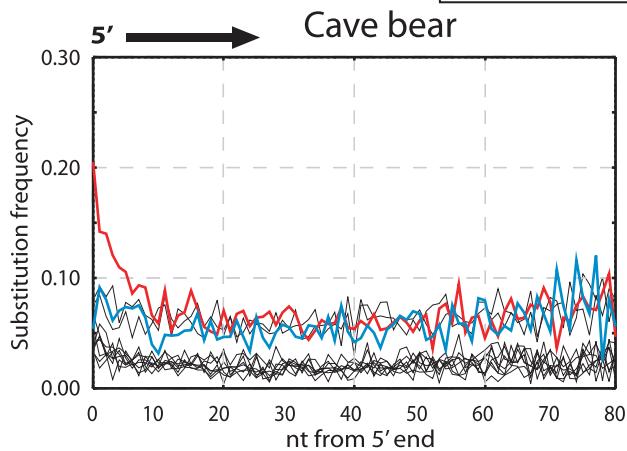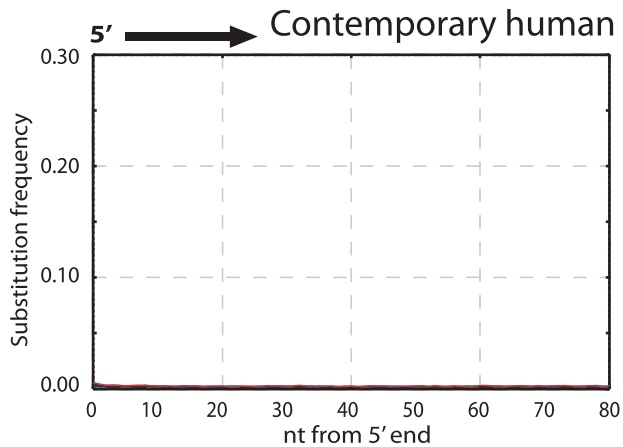

Supplement: pnas_0704665104_2.pdf [file pnas_0704665104_2.pdf]

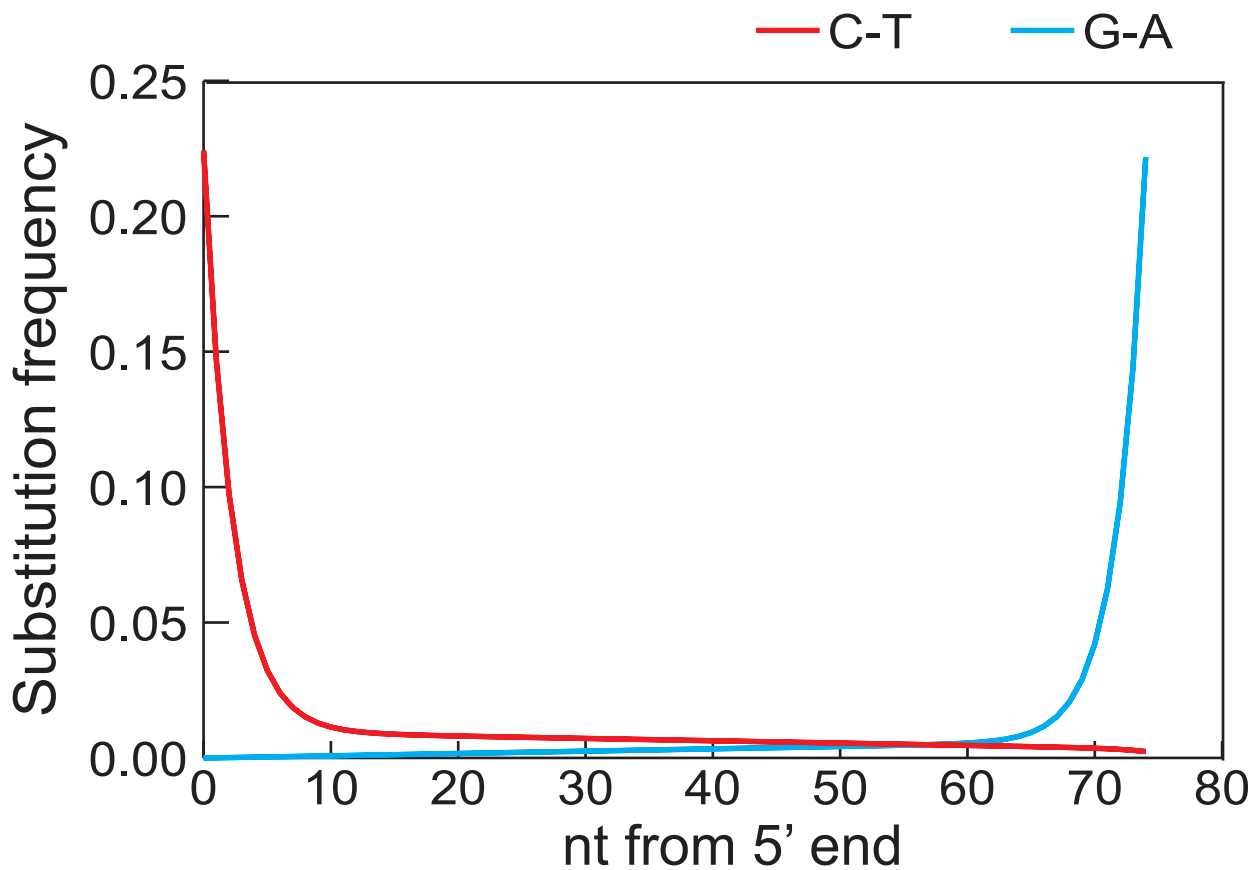

Supplement: pnas_0704665104_3.pdf [file pnas_0704665104_3.pdf]

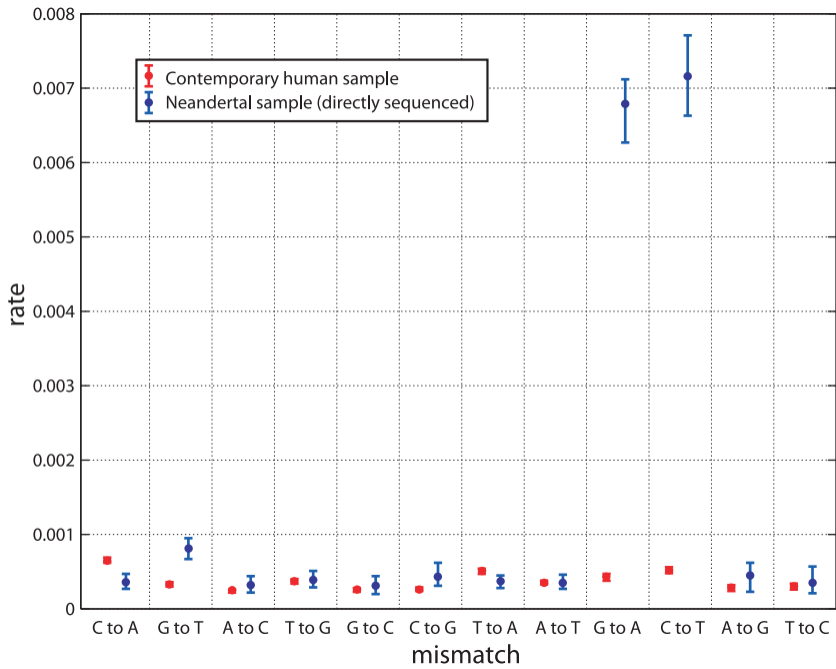

Supplement: pnas_0704665104_4.pdf [file pnas_0704665104_4.pdf]
